# Supplementary material
Source: ML conference proceedings conference paper supplement (https://proceedings.mlr.press/v84/viinikka18a.html)
Supplement: Supplementary file [file viinikka18a-supp.pdf]

# Intersection-Validation: A Method for Evaluating Structure Learning without Ground Truth

*Supplement*

Jussi Viinikka, Ralf Eggeling, Mikko Koivisto

Department of Computer Science, University of Helsinki, Finland

{jussivii,eggeling,mkhkoivi}@cs.helsinki.fi

## Contents

|          |                                                                      |           |
|----------|----------------------------------------------------------------------|-----------|
| <b>1</b> | <b>Partial Hamming distances</b>                                     | <b>2</b>  |
| <b>2</b> | <b>Ground truth DAGs, CPDAG, and agreement graphs</b>                | <b>4</b>  |
| 2.1      | Alarm . . . . .                                                      | 4         |
| 2.2      | Insurance . . . . .                                                  | 6         |
| 2.3      | Sachs . . . . .                                                      | 8         |
| <b>3</b> | <b>Performance of intersection-validation in pairwise comparison</b> | <b>10</b> |

# 1 Partial Hamming distances

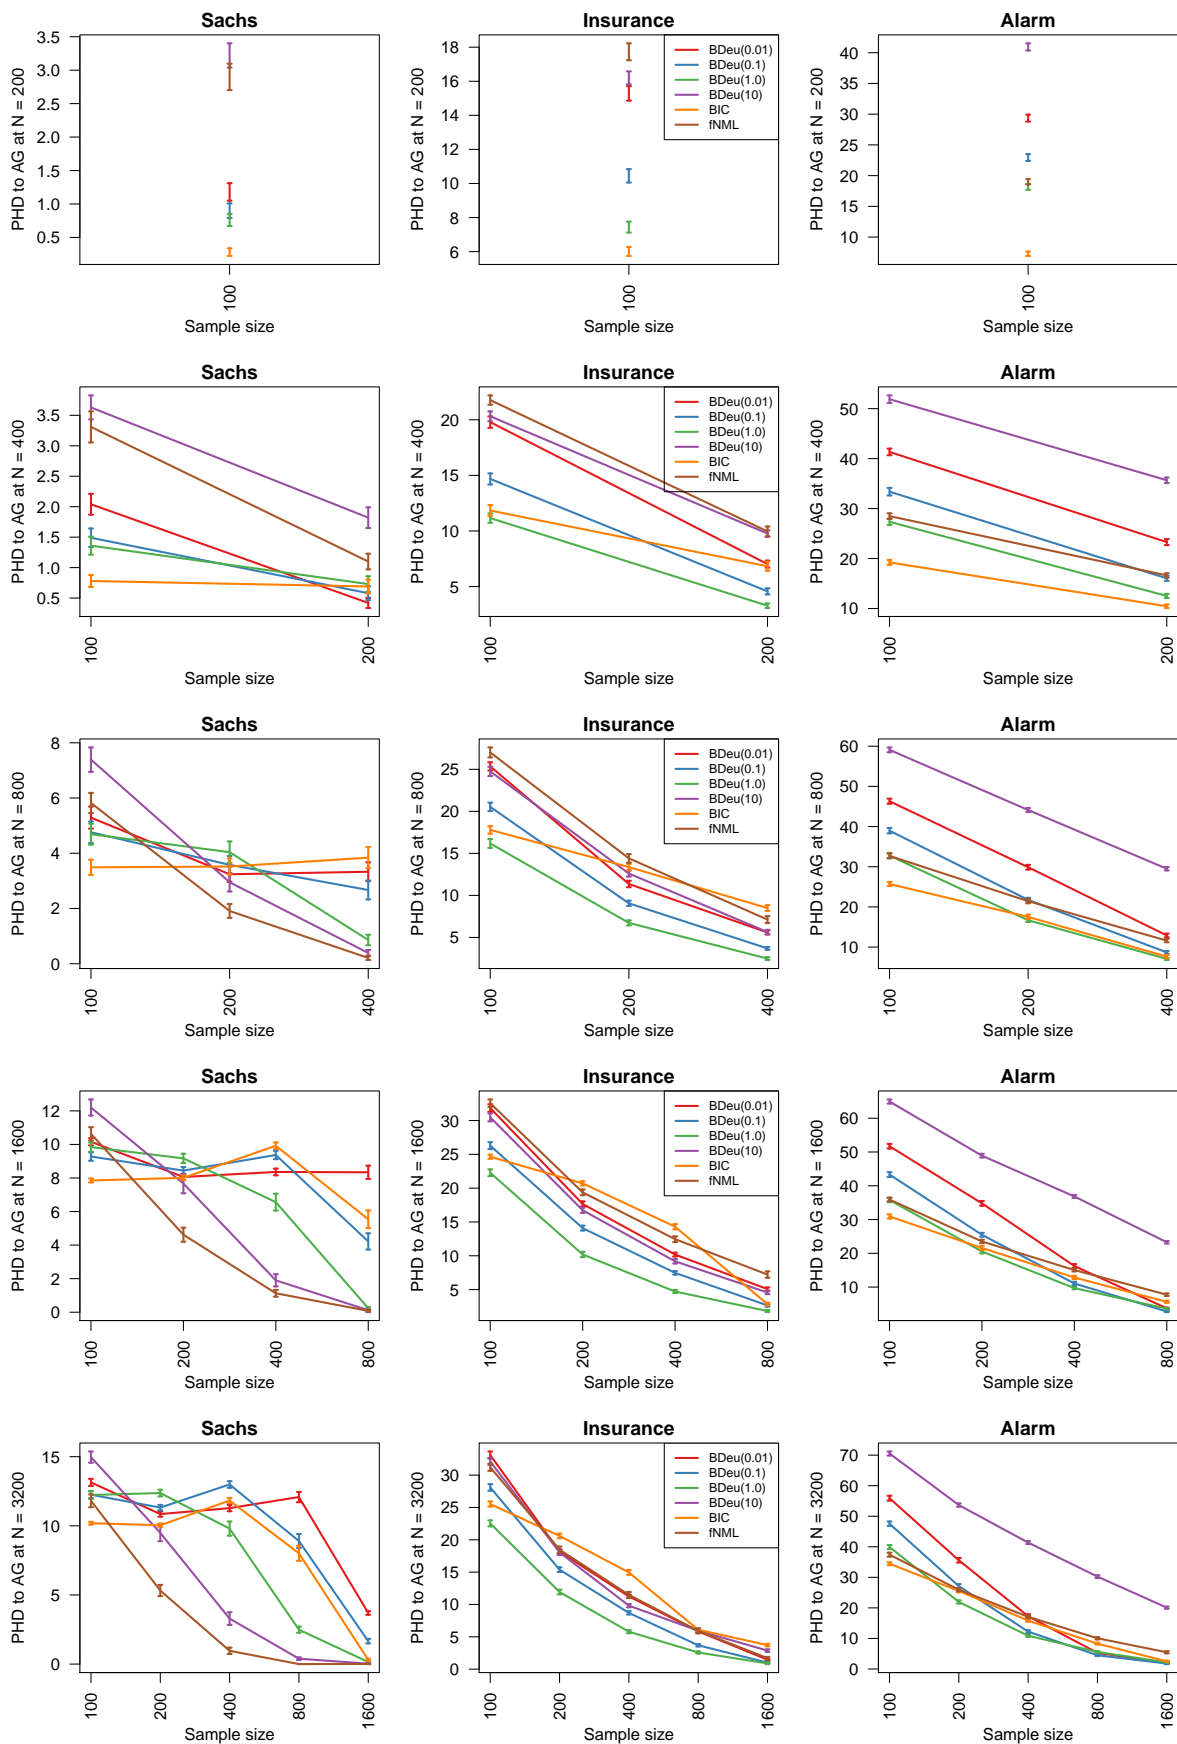

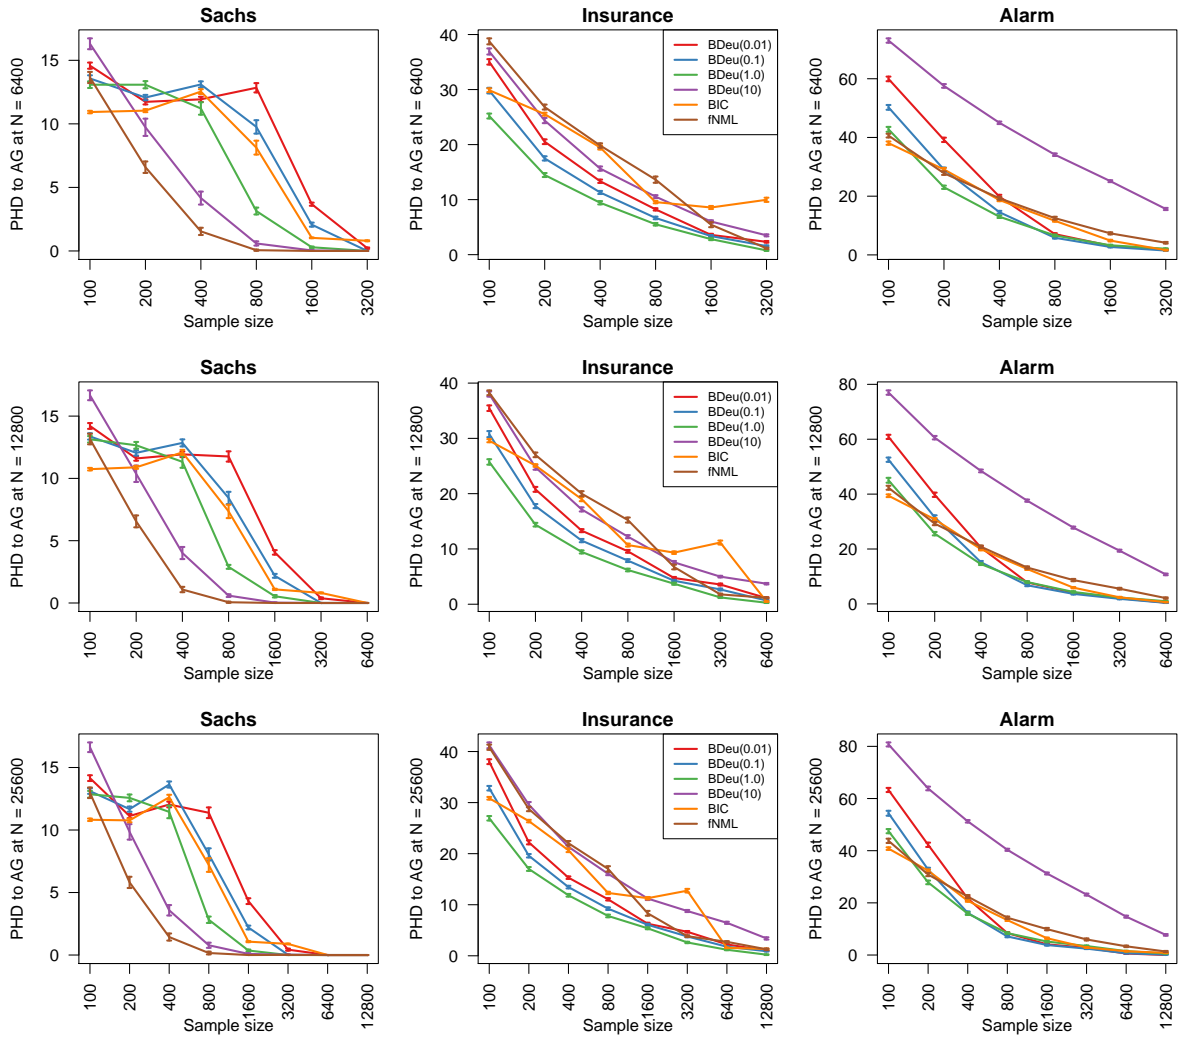

## 2 Ground truth DAGs, CPDAG, and agreement graphs

Order in all cases from left to right (and top to bottom): DAG, CPDAG, Agreement graph at intersection points 100, 200, 400, 800, 1600, 3200, 6400, 12800, and 25600. All agreement graphs are from the first data subsample.

### 2.1 Alarm

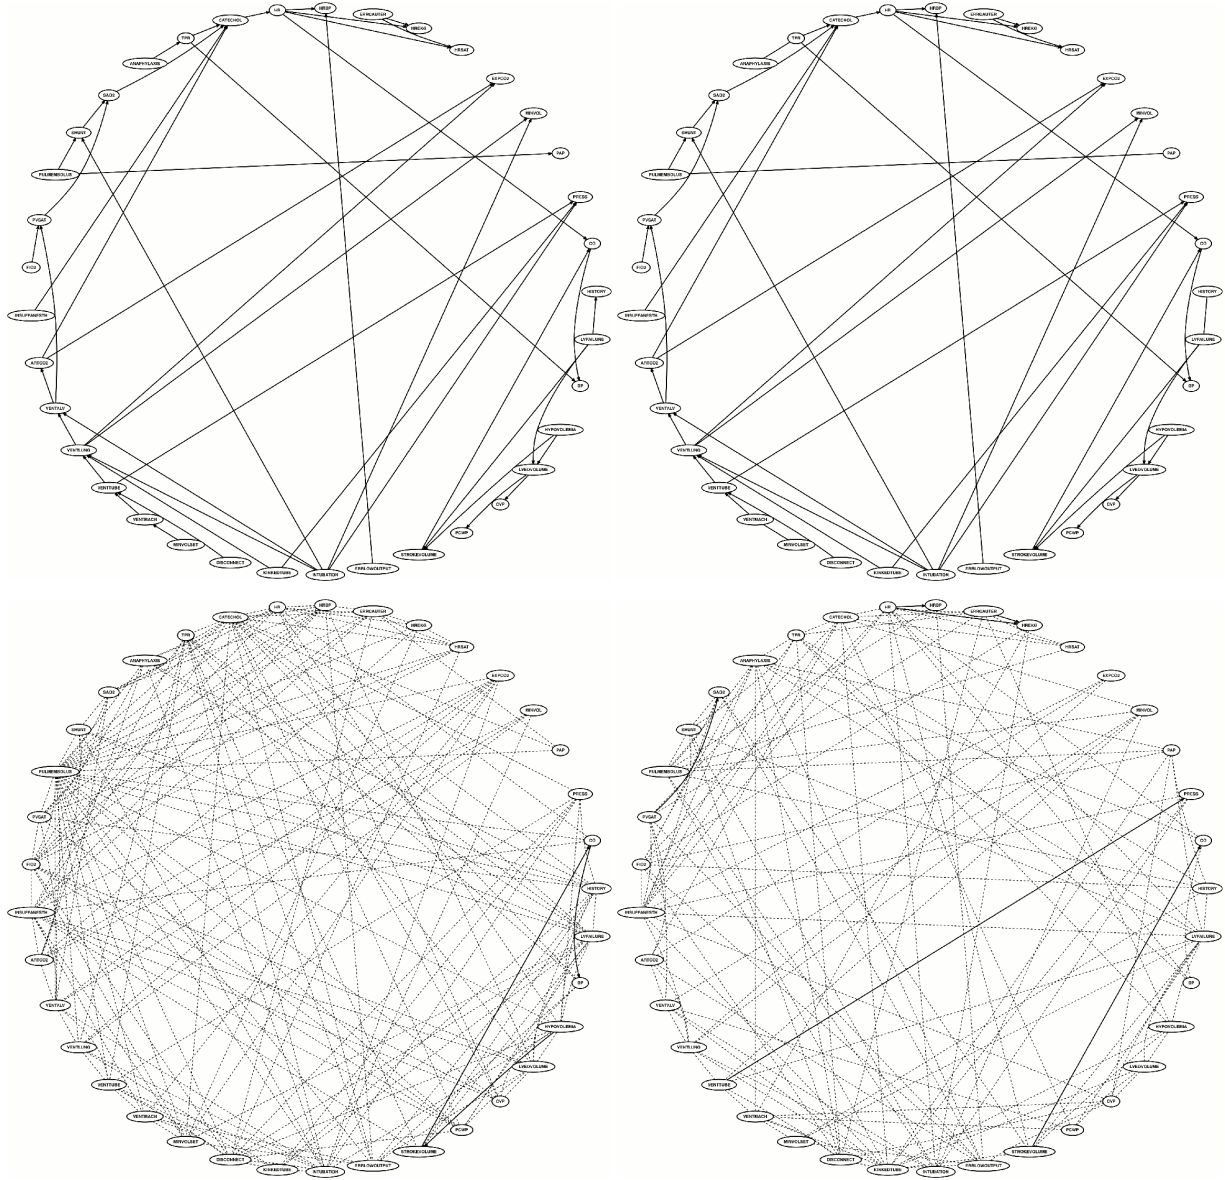

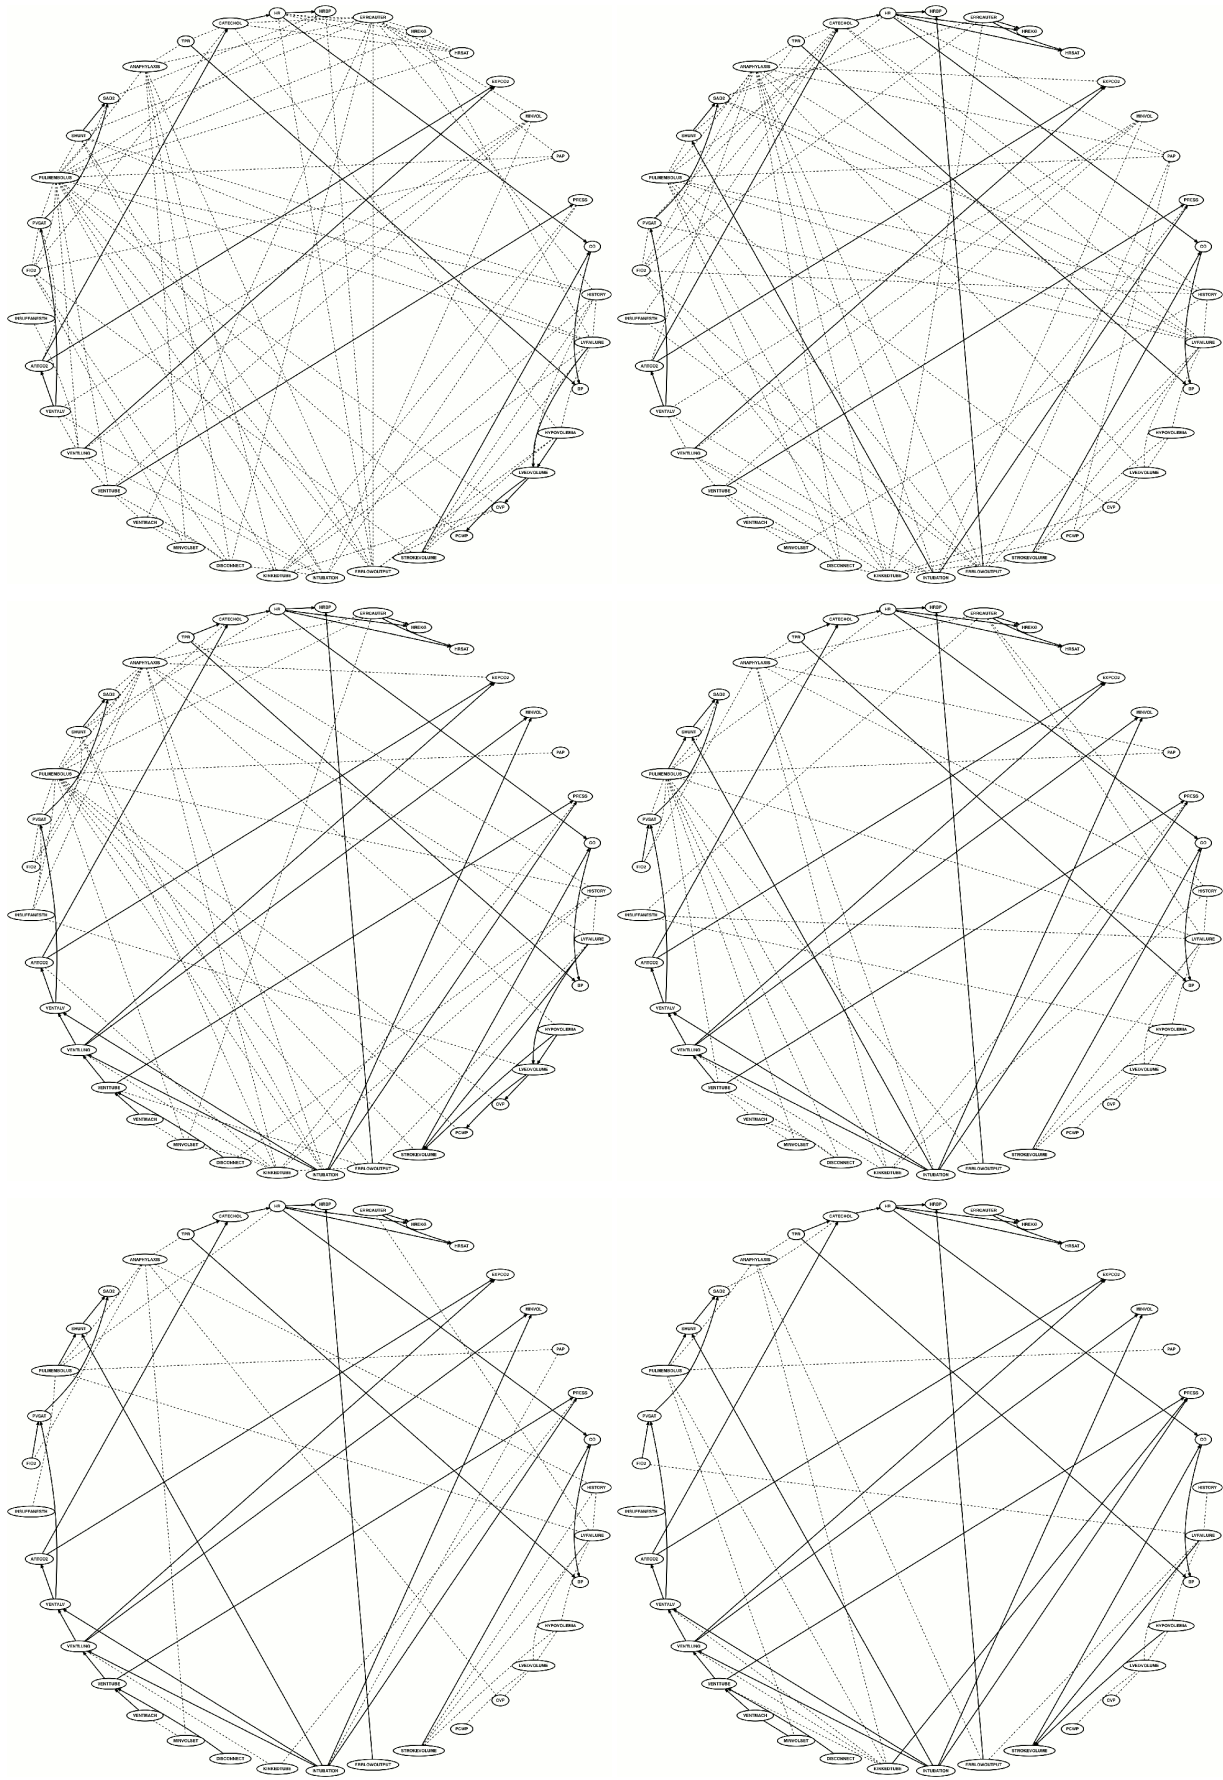

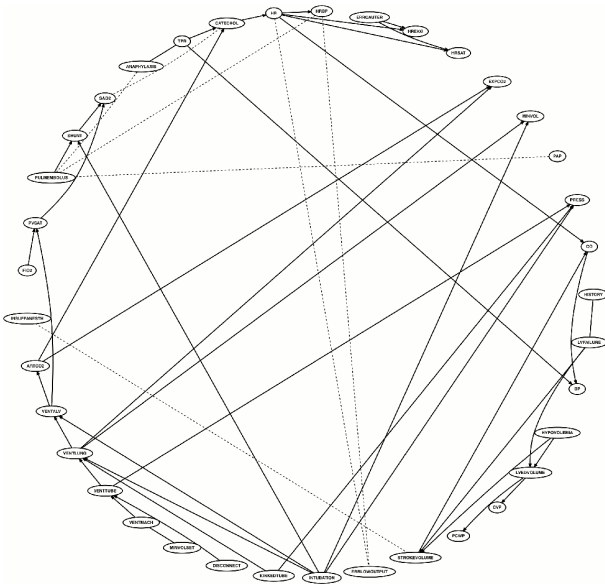

### 2.2 Insurance

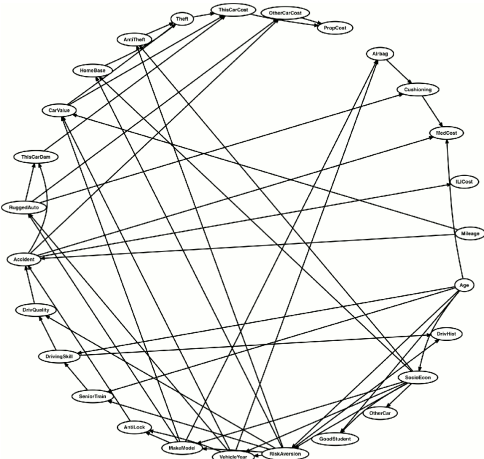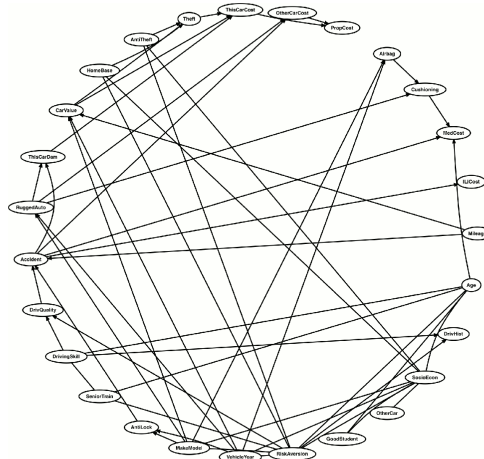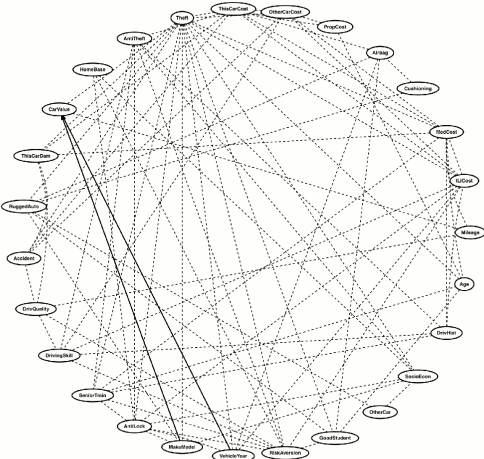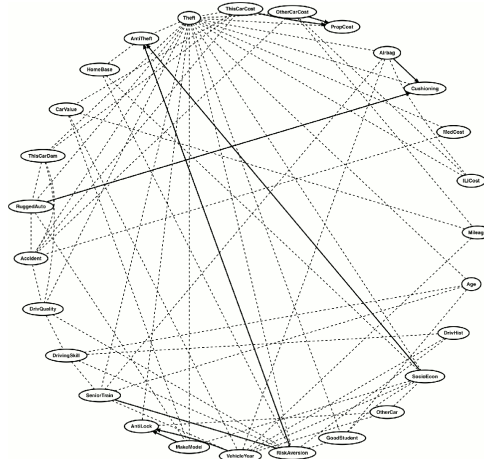





2.3 Sachs

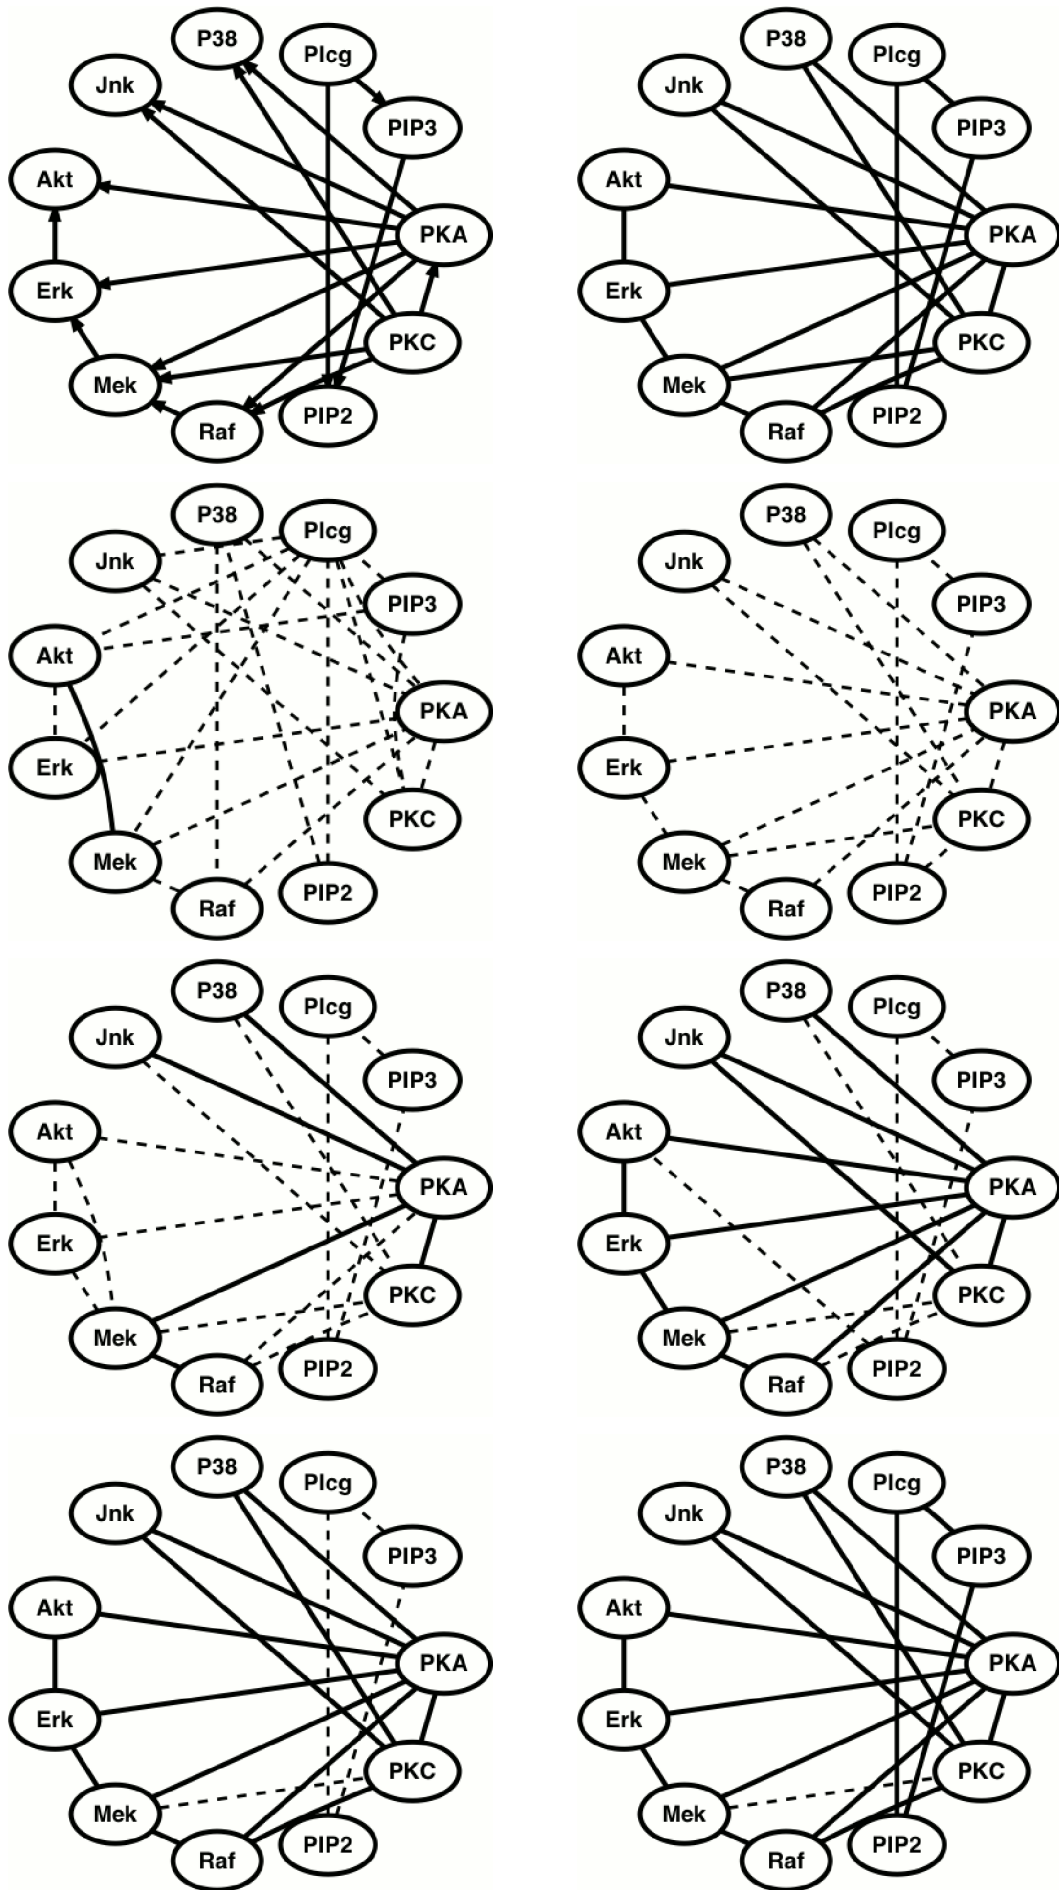



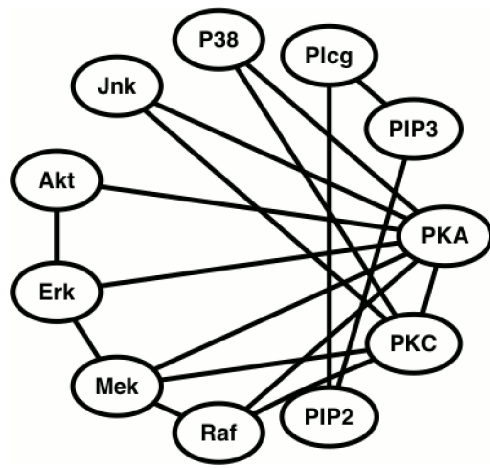

### 3 Performance of intersection-validation in pairwise comparison

To evaluate the performance of intersection-validation in a setting limited to pairs of structure estimators, we ran the procedure (Section 4 of the paper). For each pair the procedure ranks the estimators at different sample sizes using various intersection points for a total of 36 rankings per pair and data set. Contrasting these rankings to the ones obtained by comparing against the ground-truth structure, we calculated the proportion of cases where the two rankings were equal at the corresponding sample sizes. On average, over all estimator pairs and data sets, the proportions is 0.87; for *Sachs*, *Insurance*, and *Alarm*, the mean proportions are 0.87, 0.82 and 0.91 respectively. Tables 1–3 summarize the results for the three data sets and for all pairs of estimators.

Table 1: Accuracy of intersection-validation in pairwise comparison of structure learning algorithms (scoring functions) for *Sachs*

|               | BDeu ess 0.1 | BDeu ess 1 | BDeu ess 10 | BIC  | fNML |
|---------------|--------------|------------|-------------|------|------|
| BDeu ess 0.01 | 0.94         | 0.83       | 0.83        | 0.94 | 0.86 |
| BDeu ess 0.1  |              | 0.75       | 0.83        | 0.89 | 0.81 |
| BDeu ess 1    |              |            | 0.97        | 0.81 | 0.81 |
| BDeu ess 10   |              |            |             | 0.86 | 0.86 |
| BIC           |              |            |             |      | 1.00 |

Table 2: Accuracy of intersection-validation in pairwise comparison of structure learning algorithms (scoring functions) for *Insurance*

|               | BDeu ess 0.1 | BDeu ess 1 | BDeu ess 10 | BIC  | fNML |
|---------------|--------------|------------|-------------|------|------|
| BDeu ess 0.01 | 0.92         | 0.75       | 0.69        | 0.92 | 0.89 |
| BDeu ess 0.1  |              | 0.67       | 0.97        | 0.94 | 0.97 |
| BDeu ess 1    |              |            | 1.00        | 0.89 | 1.00 |
| BDeu ess 10   |              |            |             | 0.53 | 0.28 |
| BIC           |              |            |             |      | 0.83 |

Table 3: Accuracy of intersection-validation in pairwise comparison of structure learning algorithms (scoring functions) for *Alarm*

|               | BDeu ess 0.1 | BDeu ess 1 | BDeu ess 10 | BIC  | fNML |
|---------------|--------------|------------|-------------|------|------|
| BDeu ess 0.01 | 0.86         | 0.97       | 1.00        | 0.89 | 0.89 |
| BDeu ess 0.1  |              | 0.83       | 1.00        | 0.69 | 1.00 |
| BDeu ess 1    |              |            | 1.00        | 0.72 | 0.97 |
| BDeu ess 10   |              |            |             | 1.00 | 1.00 |
| BIC           |              |            |             |      | 0.89 |
